# Supplementary material
Source: PubMed Central journal article supplement (PMC8742248)
Supplement: NIHMS1764391-supplement-Supplement.pdf [file NIHMS1764391-supplement-Supplement.pdf]

---

**Supplementary information**

---

**A multi-country test of brief reappraisal interventions on emotions during the COVID-19 pandemic**

# **A multi-country test of brief reappraisal interventions on emotions during the COVID-19 pandemic**

## **Supplementary Information**

### **Table of contents**

|                                                                                                                                                                                         |           |
|-----------------------------------------------------------------------------------------------------------------------------------------------------------------------------------------|-----------|
| <b>Supplementary Table 1. Sample size per country/region.</b>                                                                                                                           | <b>3</b>  |
| <b>Supplementary Table 2. Sample size per month.</b>                                                                                                                                    | <b>8</b>  |
| <b>Supplementary Table 3. Effect sizes, frequentist statistics, and Bayes factors for each preregistered hypothesis using the full sample (no exclusions except for duplicate IDs).</b> | <b>9</b>  |
| <b>Supplementary Figure 1. Effect sizes of both reappraisal interventions (vs. both control conditions combined) on six primary outcomes by country/region in alphabetical order.</b>   | <b>13</b> |
| <b>Supplementary Figure 2. Effect sizes of reconstrual vs. repurposing on six primary outcomes by country/region in alphabetical order.</b>                                             | <b>14</b> |
| <b>Supplementary Methods</b>                                                                                                                                                            | <b>15</b> |
| <b>Details of analytical models in exploratory analyses</b>                                                                                                                             | <b>15</b> |
| Pairwise comparisons of conditions on primary outcomes.                                                                                                                                 | 15        |
| Supplementary Table 4. Model specification for pairwise comparisons of conditions on primary outcomes.                                                                                  | 15        |
| Supplementary Table 5. Model specification for exploratory outcomes.                                                                                                                    | 15        |
| <b>Supplementary Results</b>                                                                                                                                                            | <b>17</b> |
| <b>Results of moderators</b>                                                                                                                                                            | <b>17</b> |
| Motivation to use the given strategy                                                                                                                                                    | 17        |
| Supplementary Figure 3. Primary outcomes by condition and motivation to use the given strategy.                                                                                         | 17        |
| Supplementary Table 6. Frequentist statistics for interactions between reappraisal conditions and motivation to use the given strategy.                                                 | 17        |
| Belief in the effectiveness of the given strategy                                                                                                                                       | 19        |
| Supplementary Figure 4. Primary outcomes by condition and belief in the effectiveness of the given strategy.                                                                            | 20        |
| Supplementary Table 7. Frequentist statistics for interactions between reappraisal conditions and belief in the effectiveness of the given strategy.                                    | 20        |
| Individualism                                                                                                                                                                           | 22        |

|                                                                                                                                                              |           |
|--------------------------------------------------------------------------------------------------------------------------------------------------------------|-----------|
| Supplementary Table 8. Frequentist statistics for interactions between reappraisal conditions and individualism.                                             | 22        |
| Gender                                                                                                                                                       | 24        |
| Supplementary Table 9. Frequentist statistics for interactions between reappraisal conditions and the contrast between females and males.                    | 24        |
| Socioeconomic status                                                                                                                                         | 25        |
| Supplementary Table 10. Frequentist statistics for interactions between reappraisal conditions and employment status.                                        | 26        |
| Supplementary Table 11. Frequentist statistics for interactions between reappraisal conditions and subjective socioeconomic status.                          | 32        |
| Supplementary Table 12. Frequentist statistics for interactions between reappraisal conditions and education level.                                          | 34        |
| Lockdown status                                                                                                                                              | 35        |
| Supplementary Table 13. Frequentist statistics for interactions between reappraisal conditions and lockdown status.                                          | 36        |
| <b>Results for intentions to enact potentially harmful versus beneficial behaviours</b>                                                                      | <b>39</b> |
| Supplementary Table 14. Effect sizes on behavioral intentions between two reappraisal conditions combined and two control conditions combined.               | 39        |
| <b>Results for loneliness and social connectedness</b>                                                                                                       | <b>41</b> |
| Supplementary Table 15. Effect sizes on loneliness and social connectedness between two reappraisal conditions combined and two control conditions combined. | 41        |
| <b>Supplementary Table 16. Supporting claims in the “sampling plan” section.</b>                                                                             | <b>42</b> |
| <b>Supplementary References</b>                                                                                                                              | <b>44</b> |

**Supplementary Table 1.** Sample size per country/region. Countries/regions were assessed by the question “From which country are you taking this survey?”. Countries/regions are ordered by decreasing sample size without exclusion. We preregistered to exclude participants who: (1) answered both multiple choice manipulation check questions incorrectly, and (2) completed fewer than 50% of the questions in the study. We additionally excluded nine duplicate IDs. There were 1,317 missing values to the country/region question in the sample without exclusion (i.e., people did not answer this question), and 534 missing values to the country/region question in the sample after exclusion.

| Number | Country/region                 | Sample size before exclusion | Sample size after preregistered exclusion | Number excluded (%) |
|--------|--------------------------------|------------------------------|-------------------------------------------|---------------------|
| 1      | Japan - JPN                    | 2923                         | 2485                                      | 438 (14.98%)        |
| 2      | United States of America - USA | 2622                         | 2474                                      | 148 (5.64%)         |
| 3      | Poland - POL                   | 1614                         | 1332                                      | 282 (17.47%)        |
| 4      | Croatia - HRV                  | 915                          | 785                                       | 130 (14.21%)        |
| 5      | Armenia - ARM                  | 880                          | 348                                       | 532 (60.45%)        |
| 6      | Kenya - KEN                    | 749                          | 430                                       | 319 (42.59%)        |
| 7      | Australia - AUS                | 730                          | 671                                       | 59 (8.08%)          |
| 8      | France - FRA                   | 728                          | 568                                       | 160 (21.98%)        |
| 9      | Nigeria - NGA                  | 726                          | 433                                       | 293 (40.36%)        |
| 10     | United Kingdom - GBR           | 636                          | 542                                       | 94 (14.78%)         |
| 11     | Egypt - EGY                    | 634                          | 376                                       | 258 (40.69%)        |
| 12     | Hungary - HUN                  | 613                          | 569                                       | 44 (7.18%)          |
| 13     | Germany - DEU                  | 593                          | 544                                       | 49 (8.26%)          |
| 14     | South Africa - ZAF             | 585                          | 299                                       | 286 (48.89%)        |
| 15     | China - CHN                    | 572                          | 464                                       | 108 (18.88%)        |

|    |                       |     |     |              |
|----|-----------------------|-----|-----|--------------|
| 16 | Italy - ITA           | 557 | 487 | 70 (12.57%)  |
| 17 | Chile - CHL           | 548 | 449 | 99 (18.07%)  |
| 18 | Austria - AUT         | 494 | 413 | 81 (16.4%)   |
| 19 | Sweden - SWE          | 493 | 427 | 66 (13.39%)  |
| 20 | Turkey - TUR          | 441 | 349 | 92 (20.86%)  |
| 21 | Philippines - PHL     | 433 | 339 | 94 (21.71%)  |
| 22 | Costa Rica - CRI      | 432 | 238 | 194 (44.91%) |
| 23 | Mexico - MEX          | 424 | 372 | 52 (12.26%)  |
| 24 | Czechia - CZE         | 415 | 341 | 74 (17.83%)  |
| 25 | Slovakia - SVK        | 394 | 332 | 62 (15.74%)  |
| 26 | Romania - ROU         | 394 | 316 | 78 (19.8%)   |
| 27 | Slovenia - SVN        | 390 | 266 | 124 (31.79%) |
| 28 | Russia - RUS          | 379 | 306 | 73 (19.26%)  |
| 29 | Portugal - PRT        | 358 | 253 | 105 (29.33%) |
| 30 | Netherlands - NLD     | 347 | 323 | 24 (6.92%)   |
| 31 | Brazil - BRA          | 340 | 228 | 112 (32.94%) |
| 32 | Norway - NOR          | 329 | 222 | 107 (32.52%) |
| 33 | Switzerland - CHE     | 328 | 263 | 65 (19.82%)  |
| 34 | Pakistan - PAK        | 316 | 231 | 85 (26.9%)   |
| 35 | South Korea - KOR     | 315 | 282 | 33 (10.48%)  |
| 36 | Ireland - IRL         | 296 | 194 | 102 (34.46%) |
| 37 | Canada - CAN          | 268 | 259 | 9 (3.36%)    |
| 38 | North Macedonia - MKD | 265 | 150 | 115 (43.4%)  |
| 39 | Belgium - BEL         | 222 | 214 | 8 (3.6%)     |

|    |                              |     |     |             |
|----|------------------------------|-----|-----|-------------|
| 40 | Israel - ISR                 | 183 | 164 | 19 (10.38%) |
| 41 | Greece - GRC                 | 169 | 136 | 33 (19.53%) |
| 42 | Finland - FIN                | 158 | 122 | 36 (22.78%) |
| 43 | New Zealand - NZL            | 156 | 147 | 9 (5.77%)   |
| 44 | Bulgaria - BGR               | 151 | 123 | 28 (18.54%) |
| 45 | Argentina - ARG              | 138 | 88  | 50 (36.23%) |
| 46 | Serbia - SRB                 | 137 | 86  | 51 (37.23%) |
| 47 | Colombia - COL               | 132 | 96  | 36 (27.27%) |
| 48 | Taiwan - TWN                 | 116 | 73  | 43 (37.07%) |
| 49 | Hong Kong - HKG              | 89  | 82  | 7 (7.87%)   |
| 50 | Singapore - SGP              | 85  | 84  | 1 (1.18%)   |
| 51 | Morocco - MAR                | 83  | 51  | 32 (38.55%) |
| 52 | India - IND                  | 73  | 51  | 22 (30.14%) |
| 53 | Iran - IRN                   | 69  | 59  | 10 (14.49%) |
| 54 | Malaysia - MYS               | 38  | 35  | 3 (7.89%)   |
| 55 | Bangladesh - BGD             | 32  | 17  | 15 (46.88%) |
| 56 | Bosnia and Herzegovina - BIH | 30  | 27  | 3 (10%)     |
| 57 | Thailand - THA               | 15  | 8   | 7 (46.67%)  |
| 58 | Ecuador - ECU                | 14  | 9   | 5 (35.71%)  |
| 59 | Spain - ESP                  | 12  | 5   | 7 (58.33%)  |
| 60 | Saudi Arabia - SAU           | 11  | 10  | 1 (9.09%)   |
| 61 | Cyprus - CYP                 | 9   | 8   | 1 (11.11%)  |
| 62 | Indonesia - IDN              | 7   | 6   | 1 (14.29%)  |

|    |                            |   |   |            |
|----|----------------------------|---|---|------------|
| 63 | United Arab Emirates - ARE | 7 | 6 | 1 (14.29%) |
| 64 | Peru - PER                 | 6 | 4 | 2 (33.33%) |
| 65 | Luxembourg - LUX           | 5 | 4 | 1 (20%)    |
| 66 | Viet Nam - VNM             | 4 | 4 | 0 (0%)     |
| 67 | Denmark - DNK              | 4 | 3 | 1 (25%)    |
| 68 | Ukraine - UKR              | 4 | 3 | 1 (25%)    |
| 69 | Kazakhstan - KAZ           | 3 | 2 | 1 (33.33%) |
| 70 | Montenegro - MNE           | 3 | 2 | 1 (33.33%) |
| 71 | Belarus - BLR              | 2 | 2 | 0 (0%)     |
| 72 | Panama - PAN               | 2 | 2 | 0 (0%)     |
| 73 | Qatar - QAT                | 2 | 2 | 0 (0%)     |
| 74 | Sri Lanka - LKA            | 2 | 2 | 0 (0%)     |
| 75 | Nicaragua - NIC            | 2 | 1 | 1 (50%)    |
| 76 | Malawi - MWI               | 2 | 0 | 2 (100%)   |
| 77 | Malta - MLT                | 2 | 0 | 2 (100%)   |
| 78 | Guam - GUM                 | 1 | 1 | 0 (0%)     |
| 79 | Jamaica - JAM              | 1 | 1 | 0 (0%)     |
| 80 | Kosovo - XKS               | 1 | 1 | 0 (0%)     |
| 81 | Kuwait - KWT               | 1 | 1 | 0 (0%)     |
| 82 | Lebanon - LBN              | 1 | 1 | 0 (0%)     |
| 83 | Macao - MAC                | 1 | 1 | 0 (0%)     |
| 84 | Mauritius - MUS            | 1 | 1 | 0 (0%)     |
| 85 | Myanmar - MMR              | 1 | 1 | 0 (0%)     |
| 86 | New Caledonia - NCL        | 1 | 1 | 0 (0%)     |

|    |                           |   |   |          |
|----|---------------------------|---|---|----------|
| 87 | Oman - OMN                | 1 | 1 | 0 (0%)   |
| 88 | Trinidad and Tobago - TTO | 1 | 1 | 0 (0%)   |
| 89 | Venezuela - VEN           | 1 | 1 | 0 (0%)   |
| 90 | Cambodia - KHM            | 1 | 0 | 1 (100%) |
| 91 | Estonia - EST             | 1 | 0 | 1 (100%) |
| 92 | Georgia - GEO             | 1 | 0 | 1 (100%) |
| 93 | Latvia - LVA              | 1 | 0 | 1 (100%) |
| 94 | Lithuania - LTU           | 1 | 0 | 1 (100%) |



**Supplementary Table 2.** Sample size per month. We preregistered to exclude participants who: (1) answered both multiple choice manipulation check questions incorrectly, and (2) completed fewer than 50% of the questions in the study. We additionally excluded nine duplicate IDs.

| Month in 2020 | Sample size before exclusion | Sample size after preregistered exclusion | Number excluded (%) |
|---------------|------------------------------|-------------------------------------------|---------------------|
| May           | 2235                         | 1901                                      | 334 (14.94%)        |
| June          | 3827                         | 2849                                      | 978 (25.56%)        |
| July          | 3170                         | 2500                                      | 670 (21.14%)        |
| August        | 8630                         | 6513                                      | 2117 (24.53%)       |
| September     | 5285                         | 4470                                      | 815 (15.42%)        |
| October       | 4842                         | 3411                                      | 1431 (29.55%)       |

**Supplementary Table 3.** Effect sizes, frequentist statistics, and Bayes factors for each preregistered hypothesis using the full sample (no exclusions except for duplicate IDs).

| Hypothesis                                                                                                          | $B$ ( $SE$ )  | by-country/region standard deviation of $B$ | $t$ statistic (df) | Holm's adjusted $P$ value | Cohen's $d$ [95% CI] | $\log(BF_{10})$ [under robustness check] | verbal interpretation of $\log(BF_{10})^3$                                                                                                                                                                                 |
|---------------------------------------------------------------------------------------------------------------------|---------------|---------------------------------------------|--------------------|---------------------------|----------------------|------------------------------------------|----------------------------------------------------------------------------------------------------------------------------------------------------------------------------------------------------------------------------|
| Reappraisal interventions (vs. control) would reduce negative emotions in response to the photos (hypothesis 1a).   | 0.503 (0.020) | 0.119                                       | 25.119 (54.25)     | < 0.001                   | 0.384 [0.354, 0.415] | 29.50 [29.51]                            | $\log(BF) > 2$ represents "extreme evidence in favour of $H_A$ "<br><br>$2 > \log(BF) > 1.5$ represents "very strong evidence in favour of $H_A$ "                                                                         |
| Reappraisal interventions (vs. control) would reduce negative state emotions (hypothesis 1b)                        | 0.183 (0.013) | 0.066                                       | 14.034 (37.29)     | < 0.001                   | 0.309 [0.267, 0.355] | 15.33 [14.87]                            | $1.5 > \log(BF) > 1$ represents "strong evidence in favour of $H_A$ "<br><br>$1 > \log(BF) > 0.5$ represents "moderate evidence in favour of $H_A$ "                                                                       |
| Reappraisal interventions (vs. control) would reduce negative emotions about the COVID-19 situation (hypothesis 1c) | 0.239 (0.019) | 0.083                                       | 12.45 (30.92)      | < 0.001                   | 0.237 [0.199, 0.275] | 15.32 [12.81]                            | $0.5 > \log(BF) > -0.5$ represents "inconclusive evidence"<br><br>$-0.5 > \log(BF) > -1$ represents "moderate evidence in favour of $H_0$ "<br><br>$-1 > \log(BF) > -1.5$ represents "strong evidence in favour of $H_0$ " |
| Reappraisal interventions (vs. control) would increase positive emotions in response to the photos                  | 0.686 (0.025) | 0.168                                       | 27.390 (60.37)     | < 0.001                   | 0.567 [0.526, 0.608] | 34.70 [34.91]                            | $-1.5 > \log(BF) > -2$ represents "very strong evidence in favour of $H_0$ "                                                                                                                                               |

|                                                                                                                                         |                   |       |                   |         |                               |                  |                                                                                  |
|-----------------------------------------------------------------------------------------------------------------------------------------|-------------------|-------|-------------------|---------|-------------------------------|------------------|----------------------------------------------------------------------------------|
| (hypothesis 2a)                                                                                                                         |                   |       |                   |         |                               |                  | -2 > log(BF)<br>represents “extreme<br>evidence in favour<br>of H <sub>0</sub> ” |
| Reappraisal interventions (vs. control) would increase positive state emotions (hypothesis 2b)                                          | 0.176<br>(0.012)  | 0.064 | 14.110<br>(42.97) | < 0.001 | 0.323<br>[0.278,<br>0.369]    | 15.73<br>[15.27] |                                                                                  |
| Reappraisal interventions (vs. control) would increase positive emotions about the COVID-19 situation (hypothesis 2c)                   | 0.261<br>(0.018)  | 0.072 | 14.604<br>(32.27) | < 0.001 | 0.264<br>[0.228,<br>0.300]    | 15.32<br>[15.02] |                                                                                  |
| Reappraisal interventions (vs. control) would increase positive emotions about the COVID-19 situation (hypothesis 2c)                   | 0.261<br>(0.018)  | 0.072 | 14.604<br>(32.27) | < 0.001 | 0.264<br>[0.228,<br>0.300]    | 15.32<br>[15.02] |                                                                                  |
| Reconstrual would lead to greater decreases in negative emotional responses in response to the photos than repurposing (hypothesis 3a). | -0.049<br>(0.022) | 0.099 | 2.272<br>(35.00)  | 0.059   | -0.037<br>[-0.005,<br>-0.071] | 0.14<br>[-0.58]  |                                                                                  |
| Reconstrual would lead to greater decreases in negative state emotions than repurposing (hypothesis 3b)                                 | -0.004<br>(0.016) | 0.069 | -0.255<br>(27.94) | 0.800   | -0.007<br>[-0.061,<br>0.048]  | -1.09<br>[-1.89] |                                                                                  |

|                                                                                                                                |                   |                                                                             |                    |         |                              |                  |  |
|--------------------------------------------------------------------------------------------------------------------------------|-------------------|-----------------------------------------------------------------------------|--------------------|---------|------------------------------|------------------|--|
| Reconstrual would lead to greater decreases in negative emotions about the COVID-19 situation than repurposing (hypothesis 3c) | 0.069<br>(0.021)  | 0.041                                                                       | 3.25<br>(29.97)    | 0.008   | 0.068<br>[0.026,<br>0.112]   | -0.41<br>[0.42]  |  |
| Repurposing would lead to greater increases in positive emotions in response to the photos than reconstrual (hypothesis 4a)    | 0.130<br>(0.021)  | 0.105                                                                       | 6.178<br>(48.11)   | < 0.001 | 0.107<br>[0.073,<br>0.142]   | 5.02<br>[4.49]   |  |
| Repurposing would lead to greater increases in positive state emotions than reconstrual (hypothesis 4b)                        | -0.005<br>(0.011) | Random slopes by country/region were not included for the model to converge | -0.503<br>(20,470) | 0.615   | -0.009<br>[-0.048,<br>0.029] | -1.35<br>[-1.99] |  |
| Repurposing would lead to greater increases in positive emotions about the COVID-19 situation than reconstrual (hypothesis 4c) | -0.046<br>(0.026) | 0.106                                                                       | -1.789<br>(36.09)  | 0.164   | -0.047<br>[-0.099,<br>0.005] | -0.41<br>[-0.97] |  |

Note: We excluded nine duplicate IDs as including them would bias by-individual random effects. The signs of  $B$ ,  $t$  statistic, and Cohen's  $d$  are adjusted such that positive (negative) values indicate being consistent (inconsistent) with the direction specified in each respective hypothesis. For hypotheses 1-2,  $B$  reflects the difference on the original 5-point scales between the average of the means of the two control conditions and the average of the means of the two reappraisal intervention conditions. For hypotheses 3-4,  $B$  reflects the difference on the original 5-point scales between the mean of the reconstrual condition and the mean of the repurposing condition. Degrees of freedom vary due to random slopes<sup>1</sup>. Cohen's  $d$  is calculated as the raw mean difference divided by the square root of the pooled variance of all the random components.

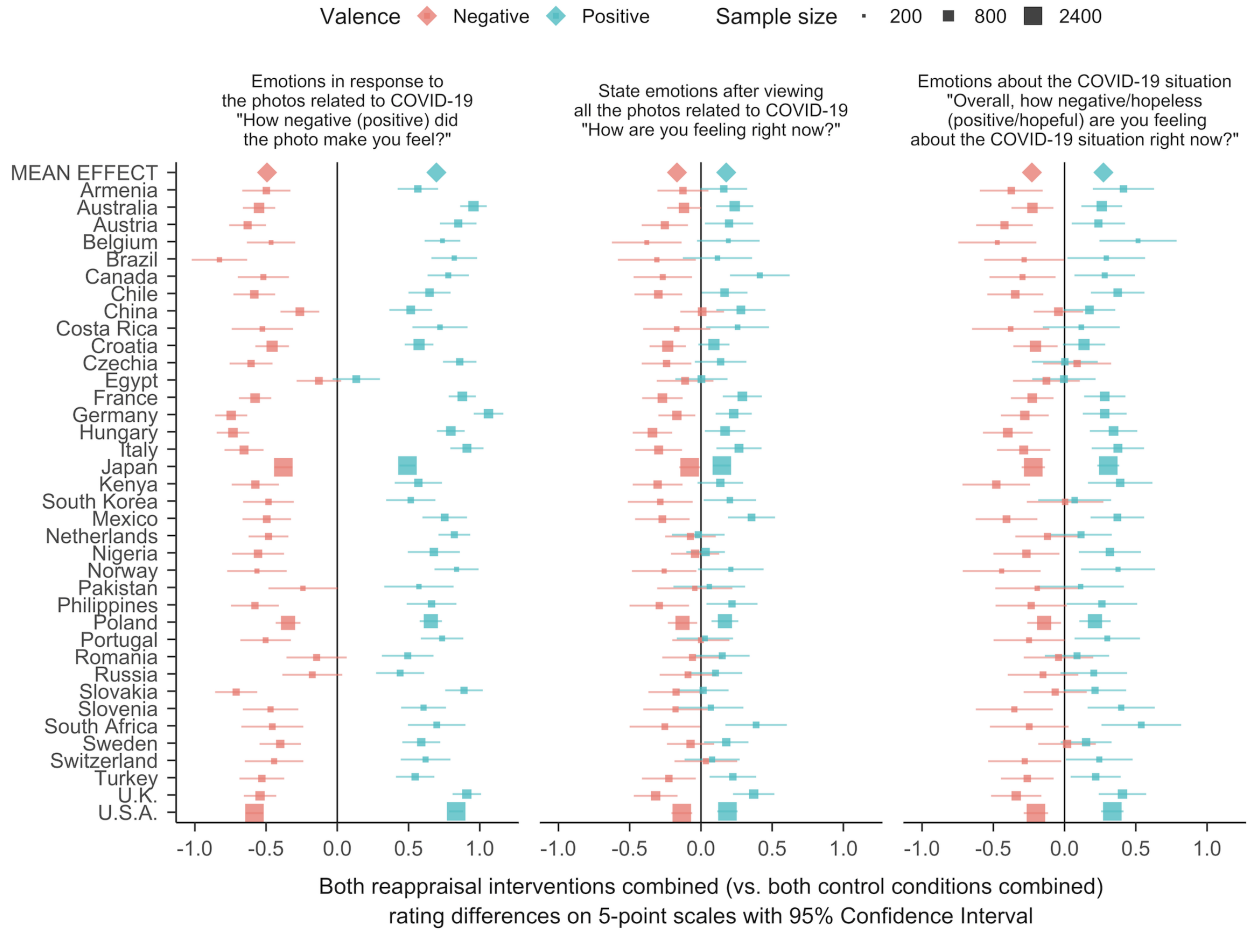

**Supplementary Figure 1. Effect sizes of both reappraisal interventions (vs. both control conditions combined) on six primary outcomes by country/region in alphabetical order.**

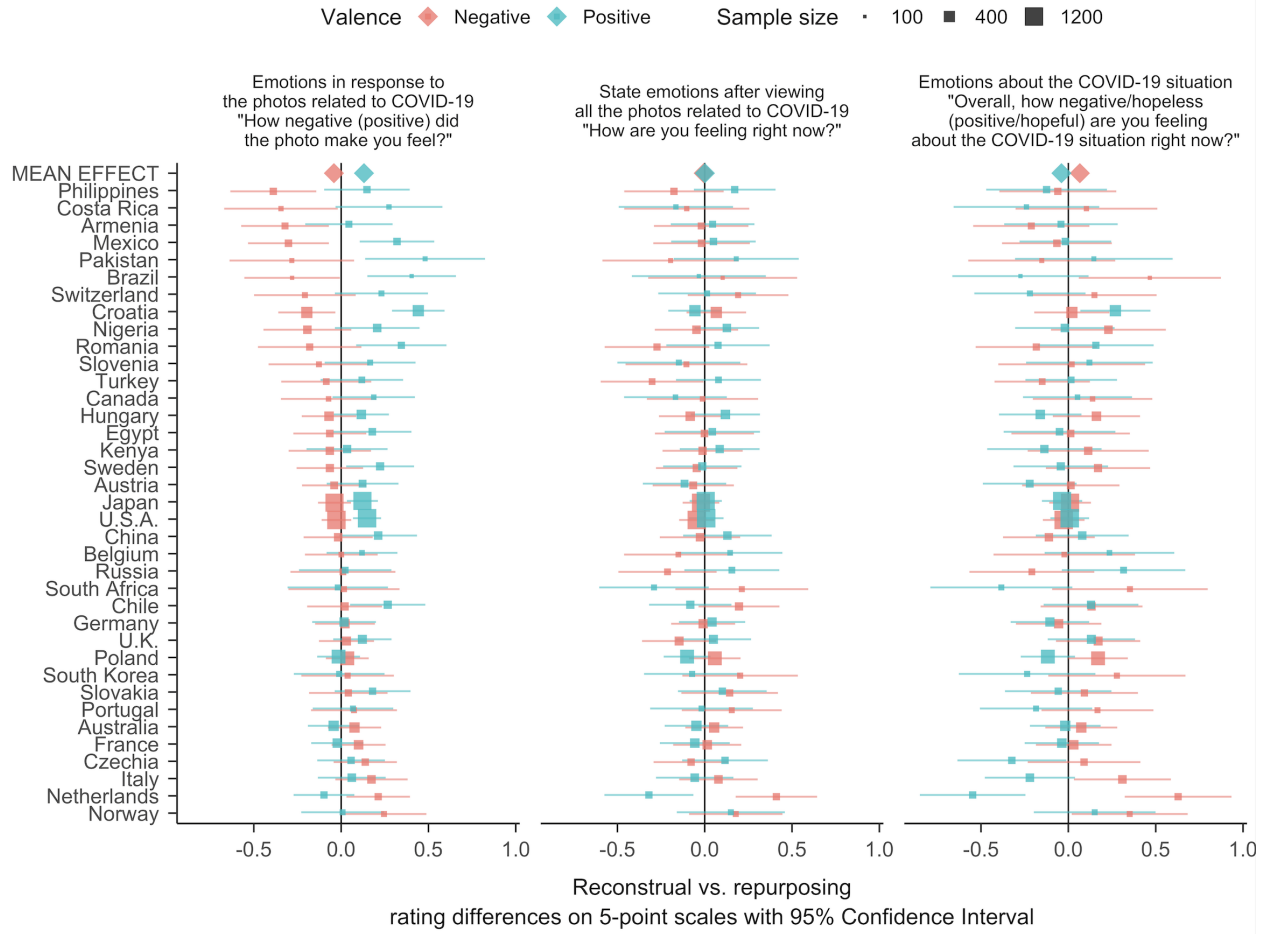

**Supplementary Figure 2. Effect sizes of reconstrual vs. repurposing on six primary outcomes by country/region in alphabetical order.**

# Supplementary Methods

## Details of analytical models in exploratory analyses

We fit multilevel models throughout and followed the same strategy regarding random effects in preregistered analysis. Some models needed adjustment in order to converge<sup>1</sup>, and we report below the final model used for the results reported in the main text.

### Pairwise comparisons of conditions on primary outcomes.

We modeled each outcome as a function of the fixed effects of the condition as a dummy variable with the passive control condition as the reference level. We controlled for the participants' negative baseline emotions for negative emotional outcomes. We controlled for the participants' positive baseline emotions for positive emotional outcomes.

**Supplementary Table 4.** Model specification for pairwise comparisons of conditions on primary outcomes.

| Outcomes                                                                                          | Random effects in the model                                                                                                                                        |
|---------------------------------------------------------------------------------------------------|--------------------------------------------------------------------------------------------------------------------------------------------------------------------|
| Negative emotions in response to the photos,<br>Positive emotions in response to the photos       | We included by-participant random intercepts and by-country/region random intercepts. By-country/region random slopes were not included for the model to converge. |
| Negative emotions about the COVID-19 situation,<br>Positive emotions about the COVID-19 situation | We included by-country/region random intercepts and by-country/region random slopes.                                                                               |
| Negative state emotions, Positive state emotions                                                  | We included by-country/region random intercepts. By-country/region random slopes were not included for the model to converge.                                      |

**Supplementary Table 5.** Model specification for exploratory outcomes.

| Outcomes                                                               | Multilevel model specification                                                                                                                                                                                                                                                                                                                                                                          |
|------------------------------------------------------------------------|---------------------------------------------------------------------------------------------------------------------------------------------------------------------------------------------------------------------------------------------------------------------------------------------------------------------------------------------------------------------------------------------------------|
| Intention to follow stay-at-home orders, Positive anticipated emotions | We modeled each outcome as a function of the fixed effects of the contrast 1 (between two reappraisal conditions combined and two control conditions combined).<br><br>We included by-country/region random intercepts and by-country/region random slopes. The correlation between by-country/region random intercepts and by-country/region random slopes was not included for the model to converge. |
| Intention to wash hands                                                | We modeled each outcome as a function of the fixed effects of the contrast 1 (between two                                                                                                                                                                                                                                                                                                               |



|                                                                                                                                                                                                                          |                                                                                                                                                                                                                                                                                                        |
|--------------------------------------------------------------------------------------------------------------------------------------------------------------------------------------------------------------------------|--------------------------------------------------------------------------------------------------------------------------------------------------------------------------------------------------------------------------------------------------------------------------------------------------------|
|                                                                                                                                                                                                                          | <p>reappraisal conditions combined and two control conditions combined).</p> <p>We included by-country/region random intercepts. By-country/region random slopes were not included for the model to converge.</p>                                                                                      |
| <p>Frequency of natural response<br/>Frequency of using reconstrual</p>                                                                                                                                                  | <p>We modeled each outcome as a function of the fixed effects of the condition as a dummy variable with the passive control condition as the reference level.</p> <p>We included by-country/region random intercepts and by-country/region random slopes.</p>                                          |
| <p>Frequency of using repurposing<br/>Frequency of using reflecting</p>                                                                                                                                                  | <p>We modeled each outcome as a function of the fixed effects of the condition as a dummy variable with the passive control condition as the reference level.</p> <p>We included by-country/region random intercepts. By-country/region random slopes were not included for the model to converge.</p> |
| <p>Motivation to follow the given instructions, Belief that the given strategy could influence their emotions, Global change of negative emotions, Global change of positive emotions, Negative anticipated emotions</p> | <p>We modeled each outcome as a function of the fixed effects of the contrast 1 (between two reappraisal conditions combined and two control conditions combined).</p> <p>We included by-country/region random intercepts and by-country/region random slopes.</p>                                     |

# Supplementary Results

## Results of moderators

We modeled each of the six primary outcomes (negative emotions in response to the photos, positive emotions in response to the photos, negative state emotions after viewing all the photos, positive state emotions after viewing all the photos, negative emotions about the COVID-19 situation, and positive emotions about the COVID-19 situation) as a function of the interaction between contrast 1 (two reappraisal conditions combined vs. the two control conditions combined) and each moderator. We controlled for the participants' negative baseline emotions for negative emotional outcomes. We controlled for the participants' positive baseline emotions for positive emotional outcomes. We included by-country/region random intercepts. We did not include by-country/region random slopes to avoid overly complex models, except for individualism. Because individualism is a country/region level variable, cross-level interactions should always include a random slope of the lower-level variable (i.e., contrast 1 in this case)<sup>2</sup>.

### Motivation to use the given strategy

Motivation to use the given strategy significantly interacted with reappraisal conditions for all six primary outcomes, such that greater motivation to use the given strategy amplified the differences between reappraisal conditions and control conditions (Supplementary Fig. 3 and Supplementary Table 6). As the simple slopes show, greater motivation to use the given strategy was associated with more negative emotional responses in the two control conditions, but not so in the two reappraisal conditions. Moreover, greater motivation to use the given strategy was associated with more positive emotional responses in the two reappraisal conditions, but not so or less so in the two control conditions.

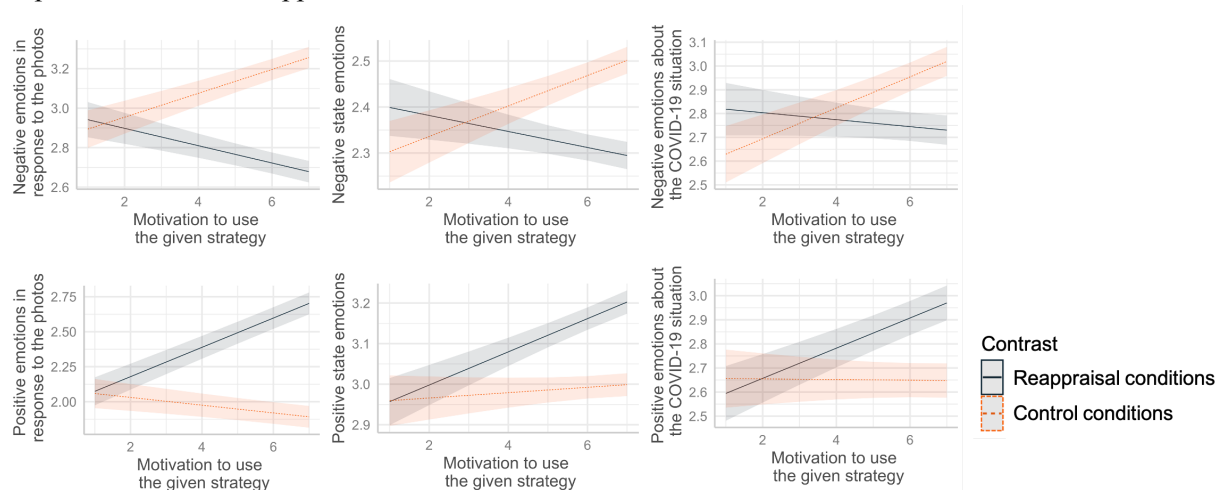

**Supplementary Figure 3. Primary outcomes by condition and motivation to use the given strategy.** Effect plots revealed that greater motivation to use the given strategy amplified the differences between reappraisal conditions and control conditions for all six primary outcomes.

**Supplementary Table 6.** Frequentist statistics for interactions between reappraisal conditions and motivation to use the given strategy.

| Outcome                                        | <i>B</i> ( <i>SE</i> ) of the interaction term | <i>t</i> statistic (df) of the interaction term | Unadjusted <i>P</i> value | Simple slope of motivation to use the given strategy                                                                                                                                                      |
|------------------------------------------------|------------------------------------------------|-------------------------------------------------|---------------------------|-----------------------------------------------------------------------------------------------------------------------------------------------------------------------------------------------------------|
| Negative emotions in response to the photos    | -0.104 (0.010)                                 | 10.272 (20,340)                                 | < 0.001                   | Two reappraisal conditions combined: <i>B</i> = -0.044, <i>SE</i> = 0.007, 95% CI = [-0.058, -0.030]<br><br>Two control conditions combined: <i>B</i> = 0.060, <i>SE</i> = 0.007, 95% CI = [0.046, 0.075] |
| Negative state emotions                        | 0.050 (0.008)                                  | 6.488 (20,000)                                  | < 0.001                   | Two reappraisal conditions combined: <i>B</i> = -0.017, <i>SE</i> = 0.005, 95% CI = [-0.028, -0.007]<br><br>Two control conditions combined: <i>B</i> = 0.033, <i>SE</i> = 0.006, 95% CI = [0.022, 0.044] |
| Negative emotions about the COVID-19 situation | 0.080 (0.013)                                  | 6.059 (20,200)                                  | < 0.001                   | Two reappraisal conditions combined: <i>B</i> = -0.015, <i>SE</i> = 0.009, 95% CI = [-0.033, 0.003]<br><br>Two control conditions combined: <i>B</i> = 0.065, <i>SE</i> = 0.010, 95% CI = [0.046,         |

|                                                |                |                  |         |                                                                                                                                                                                           |
|------------------------------------------------|----------------|------------------|---------|-------------------------------------------------------------------------------------------------------------------------------------------------------------------------------------------|
|                                                |                |                  |         | 0.084]                                                                                                                                                                                    |
| Positive emotions in response to the photos    | -0.132 (0.009) | -14.693 (20,340) | < 0.001 | Two reappraisal conditions combined: $B = 0.105$ , $SE = 0.006$ , 95% CI = [0.092, 0.117]<br><br>Two control conditions combined: $B = -0.028$ , $SE = 0.007$ , 95% CI = [-0.041, -0.015] |
| Positive state emotions                        | -0.034 (0.007) | -4.765 (19,960)  | < 0.001 | Two reappraisal conditions combined: $B = 0.041$ , $SE = 0.005$ , 95% CI = [0.031, 0.051]<br><br>Two control conditions combined: $B = 0.007$ , $SE = 0.005$ , 95% CI = [-0.004, 0.017]   |
| Positive emotions about the COVID-19 situation | -0.064 (0.013) | -5.082 (20,210)  | < 0.001 | Two reappraisal conditions combined: $B = 0.063$ , $SE = 0.009$ , 95% CI = [0.045, 0.080]<br><br>Two control conditions combined: $B = -0.001$ , $SE = 0.009$ , 95% CI = [-0.020, 0.017]  |

### Belief in the effectiveness of the given strategy

Belief in the effectiveness of the given strategy significantly interacted with reappraisal conditions for five out of our six primary outcomes (all except negative emotions about the COVID-19 situation), such that greater belief amplified the differences between reappraisal conditions and control

conditions (Supplementary Fig. 4 and Supplementary Table 7). As the simple slopes show, greater belief in the effectiveness of the given strategy was associated with more negative emotional responses in the two control conditions, but not so or less so in the two reappraisal conditions. Moreover, greater belief in the effectiveness of the given strategy was associated with more positive emotional responses in the two reappraisal conditions, but not so or less so in the two control conditions.

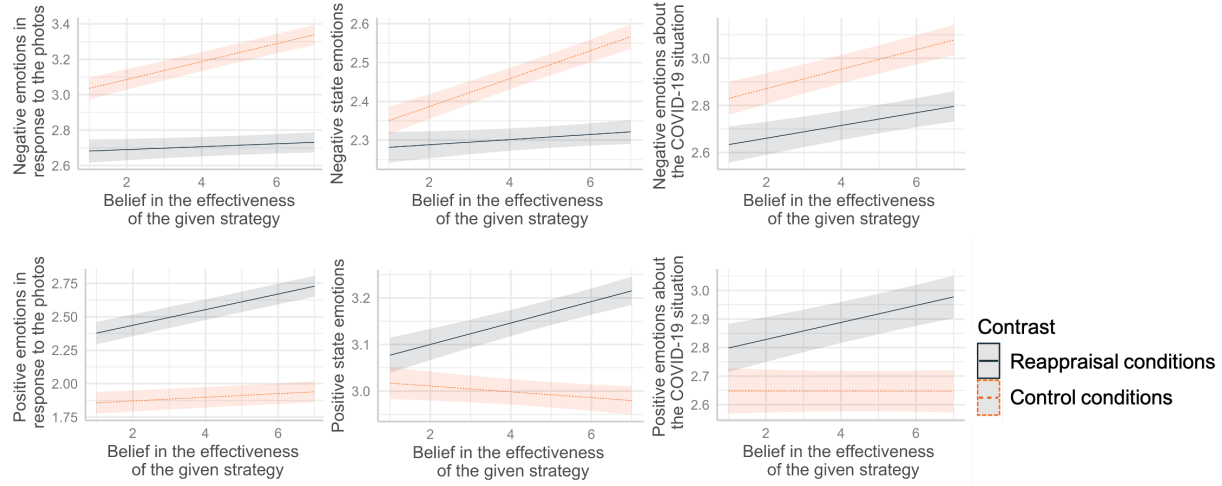

**Supplementary Figure 4. Primary outcomes by condition and belief in the effectiveness of the given strategy.** Effect plots revealed that greater belief in the effectiveness of the given strategy amplified the differences between the reappraisal conditions and control conditions for five out of our six primary outcomes (all except negative emotions about the COVID-19 situation).

**Supplementary Table 7.** Frequentist statistics for interactions between reappraisal conditions and belief in the effectiveness of the given strategy.

| Outcome                                     | $B$ ( $SE$ ) of the interaction term | $t$ statistic (df) of the interaction term | Unadjusted $P$ value | Simple slope of belief in the effectiveness of the given strategy                                                                                                                       |
|---------------------------------------------|--------------------------------------|--------------------------------------------|----------------------|-----------------------------------------------------------------------------------------------------------------------------------------------------------------------------------------|
| Negative emotions in response to the photos | -0.042 (0.006)                       | 6.964 (20,350)                             | < 0.001              | Two reappraisal conditions combined: $B = 0.008$ , $SE = 0.005$ , 95% CI = [-0.001, 0.017]<br><br>Two control conditions combined: $B = 0.050$ , $SE = 0.004$ , 95% CI = [0.042, 0.059] |
| Negative state emotions                     | 0.029 (0.005)                        | 6.334 (20,020)                             | < 0.001              | Two reappraisal conditions                                                                                                                                                              |

|                                                |                |                 |         |                                                                                                                                                                                                                                          |
|------------------------------------------------|----------------|-----------------|---------|------------------------------------------------------------------------------------------------------------------------------------------------------------------------------------------------------------------------------------------|
|                                                |                |                 |         | <p>combined: <math>B = 0.007</math>, <math>SE = 0.004</math>, 95% CI = [-0.0002, 0.014]</p> <p>Two control conditions combined: <math>B = 0.036</math>, <math>SE = 0.003</math>, 95% CI = [0.030, 0.042]</p>                             |
| Negative emotions about the COVID-19 situation | 0.014 (0.008)  | 1.807 (20,220)  | 0.071   | There was no need to examine simple effects as the interaction term was not statistically significant.                                                                                                                                   |
| Positive emotions in response to the photos    | -0.045 (0.005) | -8.241 (20,350) | < 0.001 | <p>Two reappraisal conditions combined: <math>B = 0.059</math>, <math>SE = 0.004</math>, 95% CI = [0.050, 0.067]</p> <p>Two control conditions combined: <math>B = 0.014</math>, <math>SE = 0.004</math>, 95% CI = [0.007, 0.021]</p>    |
| Positive state emotions                        | -0.029 (0.004) | -6.776 (19,980) | < 0.001 | <p>Two reappraisal conditions combined: <math>B = 0.023</math>, <math>SE = 0.003</math>, 95% CI = [0.017, 0.029]</p> <p>Two control conditions combined: <math>B = -0.006</math>, <math>SE = 0.003</math>, 95% CI = [-0.012, -0.001]</p> |

|                                                |                |                 |         |                                                                                                                                                                                           |
|------------------------------------------------|----------------|-----------------|---------|-------------------------------------------------------------------------------------------------------------------------------------------------------------------------------------------|
| Positive emotions about the COVID-19 situation | -0.030 (0.008) | -3.955 (20,230) | < 0.001 | Two reappraisal conditions combined: $B = 0.030$ , $SE = 0.006$ , 95% CI = [0.019, 0.041]<br><br>Two control conditions combined: $B = -0.0001$ , $SE = 0.005$ , 95% CI = [-0.010, 0.010] |
|------------------------------------------------|----------------|-----------------|---------|-------------------------------------------------------------------------------------------------------------------------------------------------------------------------------------------|

## Individualism

Past research suggests that participants from cultures with dialectical beliefs about negative emotions are less motivated to up-regulate positive emotions and down-regulate negative emotions, and that dialectical beliefs about negative emotions are more prevalent in Eastern (primarily East Asian) countries/regions than in Western (primarily North American) countries/regions<sup>3</sup>. While the available literature does not provide a validated index of where countries/regions fall on prevalence of dialectical beliefs about negative emotions, there are widely-used indices of individualism, a conceptually similar dimension. In the present analysis, we drew on Hofstede's individualism index<sup>4</sup> and examined the extent to which it might moderate effects of the intervention.

Individualism significantly interacted with reappraisal conditions for two out of the six primary outcomes, such that both reappraisal interventions combined (vs. both control conditions combined) had larger effects in more individualistic cultures in increasing positive emotions in response to the photos and increasing positive emotions about the COVID-19 situation (Supplementary Table 8). As with other analytical models in the moderation analysis section, we controlled for negative (positive) baseline emotions for negative (positive) emotional outcomes, so the moderation was not driven by differences in baseline emotions.

**Supplementary Table 8.** Frequentist statistics for interactions between reappraisal conditions and individualism.

| Outcome                                     | $B$ ( $SE$ ) of the interaction term | $t$ statistic (df) of the interaction term | Unadjusted $P$ value | Simple slope of individualism                                                                          |
|---------------------------------------------|--------------------------------------|--------------------------------------------|----------------------|--------------------------------------------------------------------------------------------------------|
| Negative emotions in response to the photos | 0.002 (0.001)                        | 1.979 (37.23)                              | 0.055                | There was no need to examine simple effects as the interaction term was not statistically significant. |
| Negative state emotions                     | 0.001 (0.001)                        | 1.127 (28.95)                              | 0.269                | There was no need to examine simple effects as                                                         |

|                                                |                 |                |       |                                                                                                                                                                                               |
|------------------------------------------------|-----------------|----------------|-------|-----------------------------------------------------------------------------------------------------------------------------------------------------------------------------------------------|
|                                                |                 |                |       | the interaction term was not statistically significant.                                                                                                                                       |
| Negative emotions about the COVID-19 situation | 0.0005 (0.001)  | 0.560 (22.25)  | 0.581 | There was no need to examine simple effects as the interaction term was not statistically significant.                                                                                        |
| Positive emotions in response to the photos    | -0.003 (0.001)  | -3.464 (38.42) | 0.001 | Two reappraisal conditions combined: $B = -0.003$ , $SE = 0.001$ , 95% CI = [-0.006, -0.0003]<br><br>Two control conditions combined: $B = -0.006$ , $SE = 0.001$ , 95% CI = [-0.009, -0.004] |
| Positive state emotions                        | -0.001 (0.0005) | -2.031 (27.73) | 0.052 | There was no need to examine simple effects as the interaction term was not statistically significant.                                                                                        |
| Positive emotions about the COVID-19 situation | -0.001 (0.001)  | -2.383 (14.93) | 0.031 | Two reappraisal conditions combined: $B = 0.0007$ , $SE = 0.002$ , 95% CI = [-0.002, 0.004]<br><br>Two control conditions combined: $B = -0.0007$ , $SE = 0.002$ , 95% CI = [-0.004, 0.002]   |



## Gender

We coded gender as a dummy variable with females as the reference level. Given past research, we focused on the contrast between females and males below.

The contrast between female and male significantly interacted with reappraisal conditions for four out of our six primary outcomes (all except negative emotions about the COVID-19 situation and positive emotions about the COVID-19 situation), such that both reappraisal interventions combined (vs. both control conditions combined) had larger effects for females than for males (Supplementary Table 9). As with other analytical models in the moderation analysis section, we controlled for negative (positive) baseline emotions for negative (positive) emotional outcomes, so the moderation was not driven by differences in baseline emotions.

**Supplementary Table 9.** Frequentist statistics for interactions between reappraisal conditions and the contrast between females and males.

| Outcome                                        | <i>B</i> ( <i>SE</i> ) of the interaction term | <i>t</i> statistic (df) of the interaction term | Unadjusted <i>P</i> value | Simple effect of two reappraisal conditions combined (vs. two control conditions combined)                                                                         |
|------------------------------------------------|------------------------------------------------|-------------------------------------------------|---------------------------|--------------------------------------------------------------------------------------------------------------------------------------------------------------------|
| Negative emotions in response to the photos    | -0.186 (0.022)                                 | -8.387 (20,730)                                 | < 0.001                   | Among females: <i>B</i> = -0.566, <i>SE</i> = 0.013, 95% CI = [-0.592, -0.540]<br><br>Among males: <i>B</i> = -0.381, <i>SE</i> = 0.018, 95% CI = [-0.415, -0.346] |
| Negative state emotions                        | -0.106 (0.017)                                 | -6.272 (20,390)                                 | < 0.001                   | Among females: <i>B</i> = -0.211, <i>SE</i> = 0.010, 95% CI = [-0.230, -0.191]<br><br>Among males: <i>B</i> = -0.105, <i>SE</i> = 0.014, 95% CI = [-0.131, -0.078] |
| Negative emotions about the COVID-19 situation | -0.052 (0.029)                                 | -1.832 (20,560)                                 | 0.067                     | There was no need to examine simple effects as the interaction term was not statistically significant.                                                             |

|                                                |                |                 |         |                                                                                                                                              |
|------------------------------------------------|----------------|-----------------|---------|----------------------------------------------------------------------------------------------------------------------------------------------|
| Positive emotions in response to the photos    | 0.202 (0.020)  | 10.206 (20,730) | < 0.001 | Among females: $B = 0.777$ , $SE = 0.012$ , 95% CI = [0.754, 0.801]<br><br>Among males: $B = 0.575$ , $SE = 0.016$ , 95% CI = [0.544, 0.606] |
| Positive state emotions                        | 0.034 (0.016)  | 2.138 (20,340)  | 0.033   | Among females: $B = 0.187$ , $SE = 0.009$ , 95% CI = [0.168, 0.205]<br><br>Among males: $B = 0.153$ , $SE = 0.013$ , 95% CI = [0.128, 0.178] |
| Positive emotions about the COVID-19 situation | -0.005 (0.027) | -0.166 (20,570) | 0.868   | There was no need to examine simple effects as the interaction term was not statistically significant.                                       |

## Socioeconomic status

Socioeconomic status was measured in three ways: employment status, subjective socioeconomic status, and education level.

Employment status was assessed by the question, “How would you describe your current employment?” with four response options:

- a. I am employed and earning an income
- b. I am employed, but not currently earning an income
- c. I am employed but earning an income outside of a formal job
- d. I am not employed and not earning an income

We coded employment status as a dummy variable with “I am not employed and not earning an income” as the reference level. Employment status significantly interacted with reappraisal conditions for four out of the six primary outcomes (all except negative emotions about the COVID-19 situation and positive emotions about the COVID-19 situation), such that both reappraisal interventions combined (vs. both control conditions combined) had larger effects for people who were not employed and not earning an income (vs. people who were employed and earning an income, and vs. people who were not employed but earning an income outside a formal job) (Supplementary Table 10). As with other analytical models in the moderation analysis section, we controlled for negative (positive) baseline emotions for negative (positive) emotional outcomes, so the moderation was not driven by differences in baseline emotions.

Both subjective socioeconomic status and education level had statistically significant interactions with reappraisal conditions on positive emotions in response to the photos, but not for the other five primary outcomes (Supplementary Tables 11, 12).

**Supplementary Table 10.** Frequentist statistics for interactions between reappraisal conditions and employment status.

| Outcome                                     | Interaction term                                                                                                                                          | <i>B</i> ( <i>SE</i> ) of the interaction term | <i>t</i> statistic (df) of the interaction term | Unadjusted <i>P</i> value | Simple effect of two reappraisal conditions combined (vs. two control conditions combined)                                                                                                                                                                                     |
|---------------------------------------------|-----------------------------------------------------------------------------------------------------------------------------------------------------------|------------------------------------------------|-------------------------------------------------|---------------------------|--------------------------------------------------------------------------------------------------------------------------------------------------------------------------------------------------------------------------------------------------------------------------------|
| Negative emotions in response to the photos | Reappraisal interventions and the contrast between “I am employed and earning an income” and “I am not employed and not earning an income”                | -0.052 (0.024)                                 | -2.171 (20,680)                                 | 0.030                     | Among those who answered “I am employed and earning an income”: <i>B</i> = -0.481, <i>SE</i> = 0.016, 95% CI = [-0.512, -0.450]<br><br>Among those who answered “I am not employed and not earning an income”: <i>B</i> = -0.533, <i>SE</i> = 0.018, 95% CI = [-0.568, -0.497] |
|                                             | Reappraisal interventions and the contrast between “I am employed, but not currently earning an income” and “I am not employed and not earning an income” | -0.052 (0.047)                                 | -1.094 (20,670)                                 | 0.274                     | There was no need to examine simple effects as the interaction term was not statistically significant.                                                                                                                                                                         |

|                         |                                                                                                                                                                     |                |                 |       |                                                                                                                                                                                                                                                                |
|-------------------------|---------------------------------------------------------------------------------------------------------------------------------------------------------------------|----------------|-----------------|-------|----------------------------------------------------------------------------------------------------------------------------------------------------------------------------------------------------------------------------------------------------------------|
|                         | Reappraisal interventions and the contrast between “I am not employed but earning an income outside a formal job” and “I am not employed and not earning an income” | -0.031 (0.034) | -0.921 (20,680) | 0.357 | There was no need to examine simple effects as the interaction term was not statistically significant.                                                                                                                                                         |
| Negative state emotions | Reappraisal interventions and the contrast between “I am employed and earning an income” and “I am not employed and not earning an income”                          | -0.053 (0.018) | -2.939 (20,340) | 0.003 | Among those who answered “I am employed and earning an income”: $B = -0.153$ , $SE = 0.012$ , 95% CI = [-0.177, -0.130]<br><br>Among those who answered “I am not employed and not earning an income”: $B = -0.207$ , $SE = 0.014$ , 95% CI = [-0.234, -0.180] |
|                         | Reappraisal interventions and the contrast between “I am employed, but not currently earning an income” and “I am not employed and not earning an income”           | -0.056 (0.036) | -1.549 (20,330) | 0.121 | There was no need to examine simple effects as the interaction term was not statistically significant.                                                                                                                                                         |

|                                                |                                                                                                                                                                     |                |                 |       |                                                                                                                                                                                                                                                                                         |
|------------------------------------------------|---------------------------------------------------------------------------------------------------------------------------------------------------------------------|----------------|-----------------|-------|-----------------------------------------------------------------------------------------------------------------------------------------------------------------------------------------------------------------------------------------------------------------------------------------|
|                                                | Reappraisal interventions and the contrast between “I am not employed but earning an income outside a formal job” and “I am not employed and not earning an income” | -0.051 (0.026) | -1.973 (20,340) | 0.048 | Among those who answered “I am not employed but earning an income outside a formal job”: $B = -0.156$ , $SE = 0.022$ , 95% CI = [-0.199, -0.113]<br><br>Among those who answered “I am not employed and not earning an income”: $B = -0.207$ , $SE = 0.014$ , 95% CI = [-0.234, -0.180] |
| Negative emotions about the COVID-19 situation | Reappraisal interventions and the contrast between “I am employed and earning an income” and “I am not employed and not earning an income”                          | -0.023 (0.031) | -0.739 (20,510) | 0.460 | There was no need to examine simple effects as the interaction term was not statistically significant.                                                                                                                                                                                  |
|                                                | Reappraisal interventions and the contrast between “I am employed, but not currently earning an income” and “I am not employed and not earning an income”           | -0.039 (0.062) | -0.640 (20,500) | 0.522 | There was no need to examine simple effects as the interaction term was not statistically significant.                                                                                                                                                                                  |

|                                             |                                                                                                                                                                     |                |                 |       |                                                                                                                                                                                                                                                          |
|---------------------------------------------|---------------------------------------------------------------------------------------------------------------------------------------------------------------------|----------------|-----------------|-------|----------------------------------------------------------------------------------------------------------------------------------------------------------------------------------------------------------------------------------------------------------|
|                                             | Reappraisal interventions and the contrast between “I am not employed but earning an income outside a formal job” and “I am not employed and not earning an income” | -0.003 (0.044) | -0.060 (20,510) | 0.952 | There was no need to examine simple effects as the interaction term was not statistically significant.                                                                                                                                                   |
| Positive emotions in response to the photos | Reappraisal interventions and the contrast between “I am employed and earning an income” and “I am not employed and not earning an income”                          | 0.057 (0.021)  | 2.665 (20,670)  | 0.008 | Among those who answered “I am employed and earning an income”: $B = 0.692$ , $SE = 0.014$ , 95% CI = [0.664, 0.720]<br><br>Among those who answered “I am not employed and not earning an income”: $B = 0.749$ , $SE = 0.016$ , 95% CI = [0.717, 0.780] |
|                                             | Reappraisal interventions and the contrast between “I am employed, but not currently earning an income” and “I am not employed and not earning an income”           | 0.041 (0.042)  | 0.963 (20,660)  | 0.336 | There was no need to examine simple effects as the interaction term was not statistically significant.                                                                                                                                                   |

|                         |                                                                                                                                                                     |                |                |         |                                                                                                                                                                                                                                                                                                                                  |
|-------------------------|---------------------------------------------------------------------------------------------------------------------------------------------------------------------|----------------|----------------|---------|----------------------------------------------------------------------------------------------------------------------------------------------------------------------------------------------------------------------------------------------------------------------------------------------------------------------------------|
|                         | Reappraisal interventions and the contrast between “I am not employed but earning an income outside a formal job” and “I am not employed and not earning an income” | 0.114 (0.030)  | 3.769 (20,670) | < 0.001 | <p>Among those who answered “I am not employed and not earning an income”: <math>B = 0.749</math>, <math>SE = 0.016</math>, 95% CI = [0.717, 0.780]</p> <p>Among those who answered “I am not employed but earning an income outside a formal job”: <math>B = 0.635</math>, <math>SE = 0.026</math>, 95% CI = [0.584, 0.685]</p> |
| Positive state emotions | Reappraisal interventions and the contrast between “I am employed and earning an income” and “I am not employed and not earning an income”                          | -0.050 (0.017) | 2.963 (20,290) | 0.003   | <p>Among those who answered “I am employed and earning an income”: <math>B = 0.161</math>, <math>SE = 0.011</math>, 95% CI = [0.139, 0.183]</p> <p>Among those who answered “I am not employed and not earning an income”: <math>B = 0.211</math>, <math>SE = 0.013</math>, 95% CI = [0.186, 0.236]</p>                          |
|                         | Reappraisal interventions and the contrast                                                                                                                          | 0.030 (0.034)  | 0.880 (20,280) | 0.379   | There was no need to examine simple effects                                                                                                                                                                                                                                                                                      |

|                                                |                                                                                                                                                                     |                |                 |         |                                                                                                                                                                                                                                                                                   |
|------------------------------------------------|---------------------------------------------------------------------------------------------------------------------------------------------------------------------|----------------|-----------------|---------|-----------------------------------------------------------------------------------------------------------------------------------------------------------------------------------------------------------------------------------------------------------------------------------|
|                                                | between “I am employed, but not currently earning an income” and “I am not employed and not earning an income”                                                      |                |                 |         | as the interaction term was not statistically significant.                                                                                                                                                                                                                        |
|                                                | Reappraisal interventions and the contrast between “I am not employed but earning an income outside a formal job” and “I am not employed and not earning an income” | 0.083 (0.024)  | 3.464 (20,290)  | < 0.001 | Among those who answered “I am not employed but earning an income outside a formal job”: $B = 0.128$ , $SE = 0.020$ , 95% CI = [0.088, 0.168]<br><br>Among those who answered “I am not employed and not earning an income”: $B = 0.211$ , $SE = 0.013$ , 95% CI = [0.186, 0.236] |
| Positive emotions about the COVID-19 situation | Reappraisal interventions and the contrast between “I am employed and earning an income” and “I am not employed and not earning an income”                          | -0.001 (0.030) | -0.035 (20,510) | 0.972   | There was no need to examine simple effects as the interaction term was not statistically significant.                                                                                                                                                                            |
|                                                | Reappraisal interventions and the contrast                                                                                                                          | 0.017 (0.059)  | 0.289 (20,510)  | 0.773   | There was no need to examine simple effects                                                                                                                                                                                                                                       |



|  |                                                                                                                                                                     |               |                |       |                                                                                                        |
|--|---------------------------------------------------------------------------------------------------------------------------------------------------------------------|---------------|----------------|-------|--------------------------------------------------------------------------------------------------------|
|  | between “I am employed, but not currently earning an income” and “I am not employed and not earning an income”                                                      |               |                |       | as the interaction term was not statistically significant.                                             |
|  | Reappraisal interventions and the contrast between “I am not employed but earning an income outside a formal job” and “I am not employed and not earning an income” | 0.008 (0.042) | 0.198 (20,520) | 0.843 | There was no need to examine simple effects as the interaction term was not statistically significant. |

**Supplementary Table 11.** Frequentist statistics for interactions between reappraisal conditions and subjective socioeconomic status.

| Outcome                                     | <i>B</i> ( <i>SE</i> ) of the interaction term | <i>t</i> statistic (df) of the interaction term | Unadjusted <i>P</i> value | Simple slope of subjective socioeconomic status                                                        |
|---------------------------------------------|------------------------------------------------|-------------------------------------------------|---------------------------|--------------------------------------------------------------------------------------------------------|
| Negative emotions in response to the photos | 0.008 (0.006)                                  | 1.268 (20,480)                                  | 0.205                     | There was no need to examine simple effects as the interaction term was not statistically significant. |
| Negative state emotions                     | -0.001 (0.005)                                 | -0.226 (20,130)                                 | 0.821                     | There was no need to examine simple effects as the interaction term was not statistically significant. |

|                                                |                 |                 |       |                                                                                                                                                                                  |
|------------------------------------------------|-----------------|-----------------|-------|----------------------------------------------------------------------------------------------------------------------------------------------------------------------------------|
| Negative emotions about the COVID-19 situation | 0.005 (0.008)   | 0.588 (20,300)  | 0.557 | There was no need to examine simple effects as the interaction term was not statistically significant.                                                                           |
| Positive emotions in response to the photos    | -0.011 (0.006)  | -2.007 (20,470) | 0.045 | Two reappraisal conditions combined: B = -0.0004, SE = 0.004, 95% CI = [-0.009, 0.008]<br><br>Two control conditions combined: B = -0.012, SE = 0.004, 95% CI = [-0.020, -0.004] |
| Positive state emotions                        | -0.002 (0.004)  | -0.480 (20,080) | 0.631 | There was no need to examine simple effects as the interaction term was not statistically significant.                                                                           |
| Positive emotions about the COVID-19 situation | -0.0004 (0.008) | -0.055 (20,310) | 0.956 | There was no need to examine simple effects as the interaction term was not statistically significant.                                                                           |

**Supplementary Table 12.** Frequentist statistics for interactions between reappraisal conditions and education level.

| Outcome                                        | <i>B</i> ( <i>SE</i> ) of the interaction term | <i>t</i> statistic (df) of the interaction term | Unadjusted <i>P</i> value | Simple slope of education level                                                                                                                                                               |
|------------------------------------------------|------------------------------------------------|-------------------------------------------------|---------------------------|-----------------------------------------------------------------------------------------------------------------------------------------------------------------------------------------------|
| Negative emotions in response to the photos    | -0.007 (0.007)                                 | -1.016 (20,690)                                 | 0.309                     | There was no need to examine simple effects as the interaction term was not statistically significant.                                                                                        |
| Negative state emotions                        | -0.008 (0.005)                                 | -1.556 (20,350)                                 | 0.120                     | There was no need to examine simple effects as the interaction term was not statistically significant.                                                                                        |
| Negative emotions about the COVID-19 situation | -0.006 (0.009)                                 | -0.718 (20,520)                                 | 0.473                     | There was no need to examine simple effects as the interaction term was not statistically significant.                                                                                        |
| Positive emotions in response to the photos    | 0.020 (0.006)                                  | 3.228 (20,690)                                  | 0.001                     | Two reappraisal conditions combined: $B = 0.003$ , $SE = 0.005$ , $95\% CI = [-0.007, 0.012]$<br><br>Two control conditions combined: $B = 0.023$ , $SE = 0.005$ , $95\% CI = [0.014, 0.032]$ |

|                                                |                |                 |       |                                                                                                        |
|------------------------------------------------|----------------|-----------------|-------|--------------------------------------------------------------------------------------------------------|
| Positive state emotions                        | -0.003 (0.005) | -0.622 (20,300) | 0.534 | There was no need to examine simple effects as the interaction term was not statistically significant. |
| Positive emotions about the COVID-19 situation | 0.007 (0.009)  | 0.759 (20,530)  | 0.448 | There was no need to examine simple effects as the interaction term was not statistically significant. |

## Lockdown status

Lockdown status was assessed by the question, “Different cities and regions around the world are placing different levels of restrictions on their residents to slow the spread of COVID-19. Which of these options best describes the restrictions that are currently in place in your area?” Participants chose one out of the three following options:

- a. Total lockdown – Non-essential businesses and schools are closed and the government either legally mandates or strongly advises that citizen stay inside their residence unless they leave to buy food, medicine, or essential goods
- b. Partial lockdown – Non-essential businesses are open, but the government has closed schools and prohibited public gatherings
- c. No lockdown – Businesses, schools and gatherings are open and the government has not mandated any quarantine measures

We coded lockdown status as a dummy variable with no lockdown as the reference level. Lockdown status had only one significant interaction out of the six primary outcomes, such that both reappraisal interventions combined (vs. both control conditions combined) had larger effects to reduce negative state emotions for people who faced partial lockdown than for people who faced no lockdown (Supplementary Table 13).

**Supplementary Table 13.** Frequentist statistics for interactions between reappraisal conditions and lockdown status.

| Outcome | Interaction term | <i>B</i> ( <i>SE</i> ) of the interaction term | <i>t</i> statistic (df) of the interaction term | Unadjusted <i>P</i> value | Simple effect of two reappraisal conditions combined (vs. two control conditions combined) |
|---------|------------------|------------------------------------------------|-------------------------------------------------|---------------------------|--------------------------------------------------------------------------------------------|
|         |                  |                                                |                                                 |                           |                                                                                            |

|                                                |                                                                                     |                |                 |       |                                                                                                                                                       |
|------------------------------------------------|-------------------------------------------------------------------------------------|----------------|-----------------|-------|-------------------------------------------------------------------------------------------------------------------------------------------------------|
| Negative emotions in response to the photos    | Reappraisal interventions and the contrast between no lockdown and partial lockdown | -0.001 (0.023) | -0.050 (20,180) | 0.960 | There was no need to examine simple effects as the interaction term was not statistically significant.                                                |
|                                                | Reappraisal interventions and the contrast between no lockdown and full lockdown    | -0.047 (0.039) | -1.206 (20,190) | 0.228 | There was no need to examine simple effects as the interaction term was not statistically significant.                                                |
| Negative state emotions                        | Reappraisal interventions and the contrast between no lockdown and partial lockdown | 0.046 (0.017)  | 2.621 (19,860)  | 0.009 | No lockdown: $B = -0.146$ , $SE = 0.013$ , 95% CI = [-0.172, -0.120]<br><br>Partial lockdown: $B = -0.192$ , $SE = 0.011$ , 95% CI = [-0.214, -0.170] |
|                                                | Reappraisal interventions and the contrast between no lockdown and full lockdown    | 0.031 (0.030)  | 1.058 (19,860)  | 0.290 | There was no need to examine simple effects as the interaction term was not statistically significant.                                                |
| Negative emotions about the COVID-19 situation | Reappraisal interventions and the contrast between no lockdown and partial          | 0.052 (0.030)  | 1.760 (20,010)  | 0.078 | There was no need to examine simple effects as the interaction term was not                                                                           |

|                                             |                                                                                     |                |                 |       |                                                                                                        |
|---------------------------------------------|-------------------------------------------------------------------------------------|----------------|-----------------|-------|--------------------------------------------------------------------------------------------------------|
|                                             | lockdown                                                                            |                |                 |       | statistically significant.                                                                             |
|                                             | Reappraisal interventions and the contrast between no lockdown and full lockdown    | 0.033 (0.050)  | 0.658 (20,010)  | 0.511 | There was no need to examine simple effects as the interaction term was not statistically significant. |
| Positive emotions in response to the photos | Reappraisal interventions and the contrast between no lockdown and partial lockdown | -0.006 (0.020) | -0.270 (20,160) | 0.787 | There was no need to examine simple effects as the interaction term was not statistically significant. |
|                                             | Reappraisal interventions and the contrast between no lockdown and full lockdown    | 0.056 (0.034)  | 1.629 (20,170)  | 0.103 | There was no need to examine simple effects as the interaction term was not statistically significant. |
| Positive state emotions                     | Reappraisal interventions and the contrast between no lockdown and partial lockdown | -0.013 (0.016) | -0.814 (19,800) | 0.416 | There was no need to examine simple effects as the interaction term was not statistically significant. |
|                                             | Reappraisal interventions and the contrast between no lockdown and full lockdown    | -0.046 (0.027) | -1.674 (19,800) | 0.094 | There was no need to examine simple effects as the interaction term was not                            |

|                                                |                                                                                     |                |                 |       |                                                                                                        |
|------------------------------------------------|-------------------------------------------------------------------------------------|----------------|-----------------|-------|--------------------------------------------------------------------------------------------------------|
|                                                |                                                                                     |                |                 |       | statistically significant.                                                                             |
| Positive emotions about the COVID-19 situation | Reappraisal interventions and the contrast between no lockdown and partial lockdown | 0.028 (0.028)  | 0.973 (20,010)  | 0.331 | There was no need to examine simple effects as the interaction term was not statistically significant. |
|                                                | Reappraisal interventions and the contrast between no lockdown and full lockdown    | -0.023 (0.048) | -0.480 (20,010) | 0.632 | There was no need to examine simple effects as the interaction term was not statistically significant. |

## Results for intentions to enact potentially harmful versus beneficial behaviours

We modeled ratings of likelihood for each of the ten intention questions as a function of the interaction between contrast 1 (two reappraisal conditions combined vs. the two control conditions combined) and the type of behavior as a dummy variable (with intention to wash hands as the reference level). We included by-participant random intercepts and by-country/region random intercepts.

As shown in Supplementary Table 14, pairwise comparisons revealed that both reappraisal interventions combined (vs. both control conditions combined) significantly reduced behavioral intentions to yell at someone, to take anger out online, to spend too much time on media, and significantly increased behavioral intention to practice healthy sleep habits. Both reappraisal interventions combined (vs. both control conditions combined) did not significantly impact behavioral intentions to wash hands regularly for at least 20 seconds, to follow stay-at-home orders stringently, to eat healthy food, to get enough physical activity, to drink too much alcohol, or to use too much tobacco (e.g., smoke/vape) or other recreational drugs.

**Supplementary Table 14.** Effect sizes on behavioral intentions between two reappraisal conditions combined and two control conditions combined.

| Outcome                                                              | <i>B (SE)</i>  | <i>z</i> statistic | Unadjusted <i>P</i> value |
|----------------------------------------------------------------------|----------------|--------------------|---------------------------|
| Behavioral intention to yell at someone                              | -0.093 (0.024) | -3.791             | < 0.001                   |
| Behavioral intention to take anger out online                        | -0.064 (0.024) | -2.598             | 0.009                     |
| Behavioral intention to spend too much time on media                 | -0.052 (0.024) | -2.127             | 0.033                     |
| Behavioral intention to practice healthy sleep habits                | 0.060 (0.024)  | 2.445              | 0.015                     |
| Behavioral intention to wash hands regularly for at least 20 seconds | 0.036 (0.024)  | 1.454              | 0.146                     |
| Behavioral intention to follow stay-at-home orders stringently       | 0.002 (0.024)  | 0.083              | 0.934                     |
| Behavioral intention to eat healthy food                             | 0.043 (0.024)  | 1.740              | 0.082                     |
| Behavioral intention to get enough physical activity                 | 0.032 (0.025)  | 1.318              | 0.188                     |



|                                                                                             |                |        |       |
|---------------------------------------------------------------------------------------------|----------------|--------|-------|
| Behavioral intention to drink too much alcohol                                              | -0.015 (0.024) | -0.595 | 0.552 |
| Behavioral intention to use too much tobacco (e.g., smoke/vape) or other recreational drugs | 0.008 (0.024)  | 0.332  | 0.740 |

## Results for loneliness and social connectedness

In the following analyses, we used multilevel models to model each outcome as a function of the contrast between two reappraisal conditions combined and two control conditions combined, with by-country/region random intercepts and by-country/region random slopes (except for one model noted below for it to converge). We controlled for baseline levels of loneliness when state loneliness and anticipated loneliness were dependent variables. We controlled for baseline levels of social connectedness when state social connectedness and anticipated social connectedness were dependent variables.

After viewing all the photos about the COVID-19 situation, we assessed participants on how lonely and socially connected they felt at that moment. We found that reappraisal interventions (vs. both control conditions combined) significantly reduced state loneliness and significantly increased state social connectedness (Supplementary Table 15).

To gain insight into the potential longer-term effects of reappraisal interventions, we assessed participants on how lonely and socially connected they anticipated they would feel the following week. We found that reappraisal interventions (vs. both control conditions combined) significantly reduced anticipated loneliness and significantly increased anticipated social connectedness (by-country random slopes were not included for this model to converge) (Supplementary Table 15).

**Supplementary Table 15.** Effect sizes on loneliness and social connectedness between two reappraisal conditions combined and two control conditions combined.

| Outcome                          | <i>B</i> ( <i>SE</i> ) | <i>t</i> statistic (df) | Unadjusted <i>P</i> value | Cohen's <i>d</i> [95% CI] |
|----------------------------------|------------------------|-------------------------|---------------------------|---------------------------|
| State loneliness                 | -0.080 (0.010)         | -8.282 (24.72)          | < 0.001                   | -0.135 [-0.168, -0.102]   |
| State social connectedness       | 0.084 (0.011)          | 7.740 (34.16)           | < 0.001                   | 0.154 [0.115, 0.194]      |
| Anticipated loneliness           | -0.075 (0.010)         | -7.218 (32.25)          | < 0.001                   | -0.113 [-0.146, -0.083]   |
| Anticipated social connectedness | 0.077 (0.008)          | 9.323 (20,380)          | < 0.001                   | 0.130 [0.102, 0.157]      |

**Supplementary Table 16.** Supporting claims in the “sampling plan” section.

| Claims in the “Sampling plan” section                                                                                                                                                                                                                                                                                                                                                                        | Source/Calculation                                                                                                                                                                                                                                                                                           |
|--------------------------------------------------------------------------------------------------------------------------------------------------------------------------------------------------------------------------------------------------------------------------------------------------------------------------------------------------------------------------------------------------------------|--------------------------------------------------------------------------------------------------------------------------------------------------------------------------------------------------------------------------------------------------------------------------------------------------------------|
| <p>In general, reappraisal has an average effect size of <math>d = 0.45</math>, 95% CI = [0.35, 0.56] in changing emotion experience relative to passive control conditions (i.e., no instruction, instructions to experience naturally, instructions to not regulate in a certain manner, and instructions to enhance or maintain the focal emotion).</p>                                                   | <p>See Table 3 in Webb, Miles, &amp; Sheeran<sup>6</sup>.</p>                                                                                                                                                                                                                                                |
| <p>Experimental disclosure and expressive writing, which inspired the instruction in the active control condition, have an average effect size of <math>d = 0.07</math>, 95% CI = [0.05, 0.17] in improving psychological health (including emotional responses), relative to engaging in non-treatment neutral activities (e.g., describing what they have done in the past 24 hours) or no activities.</p> | <p>See Table 2 in Frattaroli<sup>7</sup>. We transformed the r-effect size into Cohen’s <math>d</math> with <a href="https://www.psychometrica.de/effect_size.html">https://www.psychometrica.de/effect_size.html</a>.</p>                                                                                   |
| <p>Reconstrual is most similar to the subtype of reappraisal called “reappraising emotional stimulus” in Webb, Miles, &amp; Sheeran’s<sup>6</sup> meta-analysis, which has a <math>d = 0.38</math>, 95% CI = [0.21, 0.55] in changing emotion experience (this effect size is primarily for negative emotions, as all but one study examined negative emotions).</p>                                         | <p>See Table 2 and Table 3 in Webb, Miles, &amp; Sheeran<sup>6</sup>.</p>                                                                                                                                                                                                                                    |
| <p>Repurposing is similar to the construct “benefit finding” (perceiving positive consequences that resulted from a traumatic event), which is associated with positive well-being, <math>d = 0.45</math>, 95% CI = [0.37, 0.52], but not global distress, <math>d = 0.00</math>, 95% CI = [-0.04, 0.04].</p>                                                                                                | <p>See Table 2 in Helgeson, Reynolds, &amp; Tomich<sup>8</sup>. We transformed the r-effect size into Cohen’s <math>d</math> with <a href="https://www.psychometrica.de/effect_size.html">https://www.psychometrica.de/effect_size.html</a>.</p>                                                             |
| <p>Repurposing is also similar to the subtype of reappraisal called “positive reappraisal,” which is more effective in increasing positive thoughts than other types of reappraisals, <math>d = 0.49</math>, 95% CI = [0.25, 0.72] relative to detached reappraisal<sup>9</sup>.</p>                                                                                                                         | <p>See page 421 in Shiota &amp; Levenson<sup>9</sup> for results on positive thoughts. We used the R package <code>esc</code><sup>10</sup> to calculate the Cohen’s <math>d</math>. See the “Sampling plan supporting evidence.R” R script at <a href="https://osf.io/mf5z4/">https://osf.io/mf5z4/</a>.</p> |

The lowest level of intercept variances in our simulation was chosen on the basis of an ongoing multi-country/region project tracking rates of depression ( $\sigma^2_{\text{intercept}} = 0.04$ ) and worries about the COVID-19 ( $\sigma^2_{\text{intercept}} = 0.06$ ) across countries during the COVID-19 outbreak<sup>11</sup>.

As one example to show that similar appraisals associate with similar emotional experiences, we find the associations vary little across countries between perceived insufficient government response and depression ( $\sigma^2_{\text{slope}} = 0.003$ ) and between perceived insufficient government response and worries ( $\sigma^2_{\text{slope}} = 0.003$ ) during the COVID-19 pandemic<sup>11</sup>.

See the “Sampling plan supporting evidence.R” R script at <https://osf.io/mf5z4/>.

## Supplementary References

1. Brauer, M. & Curtin, J. J. Linear mixed-effects models and the analysis of nonindependent data: a unified framework to analyze categorical and continuous independent variables that vary within-subjects and/or within-items. *Psychol. Methods* **23**, 389–411 (2018).
2. Heisig, J. P., & Schaeffer, M. Why you should always include a random slope for the lower-level variable involved in a cross-level interaction. *Eur. Sociol. Rev.* **35**, 258–279 (2019).
3. Miyamoto, Y., Ma, X. & Petermann, A. G. Cultural differences in hedonic emotion regulation after a negative event. *Emotion* **14**, 804–815 (2014).
4. Hofstede, G., Hofstede, G. J., & Minkov, M. *Cultures and Organizations: Software of the Mind*. 3rd edn, (McGraw-Hill, New York, 2010).
5. Jeffreys, H. *Theory of Probability*. (Oxford University Press, 1961).
6. Webb, T. L., Miles, E. & Sheeran, P. Dealing with feeling: a meta-analysis of the effectiveness of strategies derived from the process model of emotion regulation. *Psychol. Bull.* **138**, 775–808 (2012).
7. Frattaroli, J. Experimental disclosure and its moderators: a meta-analysis. *Psychol. Bull.* **132**, 823–865 (2006).
8. Helgeson, V. S., Reynolds, K. A. & Tomich, P. L. A meta-analytic review of benefit finding and growth. *J. Consult. Clin. Psychol.* **74**, 797–816 (2006).
9. Shiota, M. N. & Levenson, R. W. Turn down the volume or change the channel? Emotional effects of detached versus positive reappraisal. *J. Pers. Soc. Psychol.* **103**, 416–429 (2012).
10. Lüdtke, D. *esc: effect size computation for meta analysis*. R package version 0.5.1 <https://cran.r-project.org/package=esc> (2019).
11. Fetzer, T. *et al.* Global behaviors and perceptions at the onset of the COVID-19 pandemic. Preprint at SSRN <https://ssrn.com/abstract=3594262> (2020).
